# Supplementary material for: Spectrum and characterization of bi-allelic variants in MMAB causing cblB-type methylmalonic aciduria
Source: PubMed Central journal article supplement (PMC9262797; doi:10.1007/s00439-021-02398-6), 2021-11-18
Supplement: 439_2021_2398_MOESM1_ESM.pdf [file 439_2021_2398_MOESM1_ESM.pdf]

# Spectrum and characterization of bi-allelic variants in *MMAB* causing *cb1B*-type methylmalonic aciduria

Patrick Forny<sup>1</sup>, Tanja Plessl<sup>1</sup>, Caroline Frei<sup>1</sup>, Celine Bürer<sup>1</sup>, D. Sean Froese<sup>1</sup>, Matthias R. Baumgartner<sup>1</sup>

<sup>1</sup> Division of Metabolism and Children's Research Center, University Children's Hospital Zurich, University of Zurich, Zurich, Switzerland

**Supplementary Information**

## Supplementary Figure 1

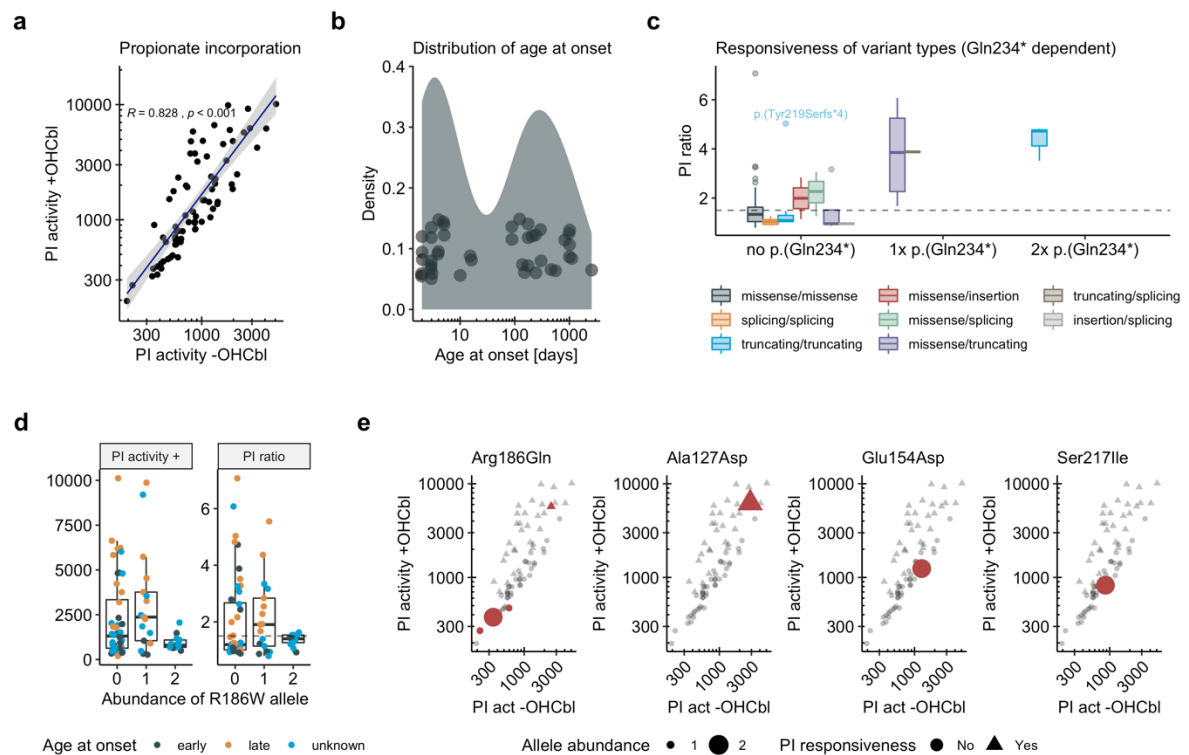

**Suppl. Fig. 1.** (a) Scatter plot of PI activity with and without supplementation of OHcbl; linear regression calculated by Pearson correlation. (b) Density distribution plot of the age of onset of patients with available information; dots represent individual patients; y axis jitter was added for better visibility. (c) PI ratios according to allele combinations, grouped based on the abundance of the p.(Gln234\*) allele. (d) PI activity supplemented with OHcbl and PI ratio of all samples, grouped based on the abundance of the p.(Arg186Trp) allele. (e) Scatter plot of PI activity with and without supplementation of OHcbl; specific alleles (plot title) are highlighted in red; triangles indicate in vitro responsiveness, dot or triangle size indicate the abundance of the specific allele (plot title).

## Supplementary Figure 2

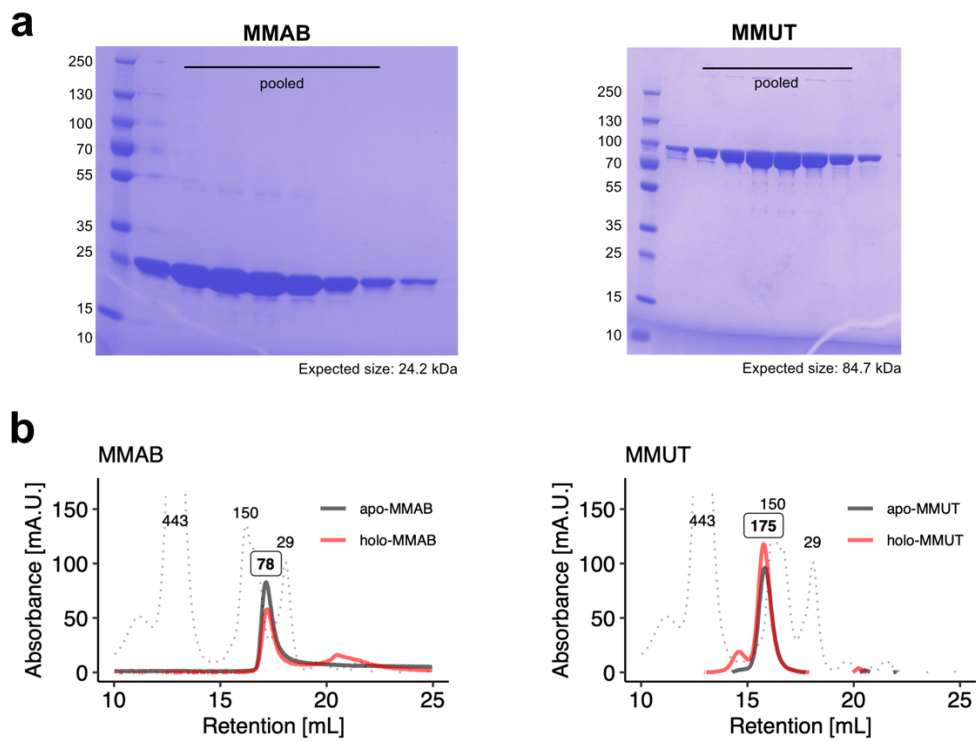

**Suppl. Fig. 2.** (a) SDS-PAGE gels indicating high purity (>95%) after protein purification for MMAB, MMUT, and MMAA. (b) Size-exclusion chromatograms with indicated peaks for the respective proteins (MMAB as homotrimer, MMUT as homodimer); dotted curve represents a standard sample allowing calculation of protein size.

### Supplementary Figure 3

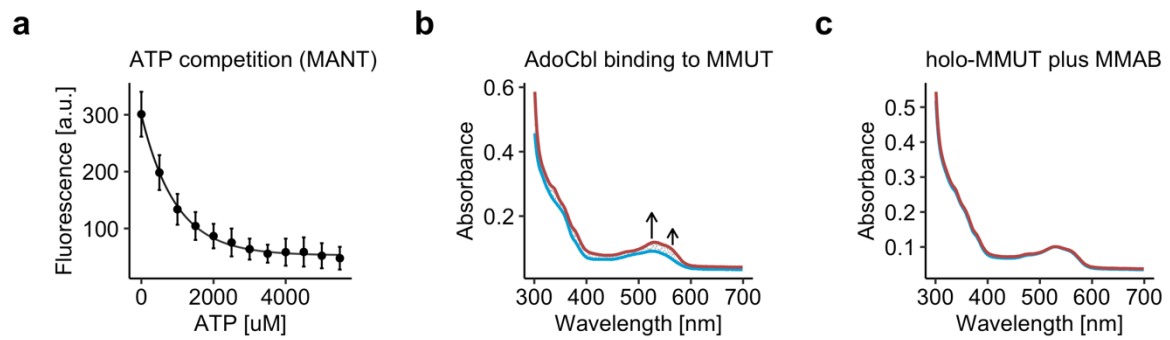

**Suppl. Fig. 3.** (a) Increasing ATP concentrations lead to exchange for MANT-ATP at the binding site of MMAB. (b) Absorbance spectrum of AdoCbl under increasing concentrations of MMUT (blue line, 0  $\mu$ M of MMUT; red line, 80  $\mu$ M of MMUT added). (c) Increasing concentration of MMAB [0-60  $\mu$ M] were added to holo-MMUT, revealing no change of the absorbance spectrum.

## Supplementary Table 1

| Exon | Direction | Oligonucleotide sequence          | PCR product size (bp) |
|------|-----------|-----------------------------------|-----------------------|
| 1    | Forward   | ACC AAT AAA AAT TGA AAC CTG AGC G | 365                   |
| 1    | Reverse   | AAC AGC GTG GAG ACG TCA CCT GAC   |                       |
| 2    | Forward   | AGA TGA CCA TCT AAG CAG TAA GG    | 304                   |
| 2    | Reverse   | CGC GCC TGG TAT ATT ATA CTT TA    |                       |
| 3    | Forward   | GGA GGT CAA GAC TAG CTC GG        | 521                   |
| 3    | Reverse   | CAA TAA GGG CTG ACA ACC           |                       |
| 4    | Forward   | GAC TGG AAA TAA TGA GCA TCC GA    | 357                   |
| 4    | Reverse   | TAA CTG GTG GCT GGA TGC TGA GT    |                       |
| 5    | Forward   | CAC CTC CAA CTC TGG GGA TCA CA    | 339                   |
| 5    | Reverse   | TGG GAT CCC AGA TGG TGA CCC TA    |                       |
| 6    | Forward   | CAC GGG TGG GTC AGT TAG CCT TGC T | 386                   |
| 6    | Reverse   | TTG GGG AAC TGG AGG ACA GCG TCT   |                       |
| 7    | Forward   | ATC CCT CTT TTC ACA GTG ACA GA    | 483                   |
| 7    | Reverse   | GTC TGT TGA TGT GTG GCT GGA TG    |                       |
| 8    | Forward   | CCA GGT GGC TCC CTC AAC TCA       | 563                   |
| 8    | Reverse   | CAG CAG CCT CTC CCA ATA AGA       |                       |
| 9    | Forward   | GCA GAA GAG CTG ACA GCG TA        | 1101                  |
| 9    | Reverse   | GGT GGC AAG AGG TGT AGA TCA       |                       |

Suppl. Table 1. Sequences of primers used in Sanger sequencing.
